# Supplementary material for: Structure–property relationships in protic ionic liquids: a thermochemical study
Source: Royal Society of Chemistry journal article supplement (doi:10.1039/c7cp02230a), 2017-01-01
Supplement: c7cp02230a1.pdf [file c7cp02230a1.pdf]

## Electronic Supplementary Information (ESI)

### Structure-Property Relationships in Protic Ionic Liquids: A Thermochemical Study

**Joshua E. S. J. Reid,<sup>a,b</sup> Filipe Agapito,<sup>c</sup> Carlos E. S. Bernardes,<sup>c</sup> Filomena Martins,<sup>c</sup>**

**Adam J. Walker,<sup>b</sup> Seishi Shimizu,<sup>a,\*</sup> and Manuel E. Minas da Piedade<sup>c,\*</sup>**

<sup>a</sup> *York Structural Biology Laboratory, Department of Chemistry, University of York,  
Heslington, York, YO10 5DD, United Kingdom; E-mail: seishi.shimizu@york.ac.uk*

<sup>b</sup> *TWI Ltd., Granta Park, Great Abington, Cambridge, CB21 6AL, United Kingdom*

<sup>c</sup> *Centro de Química e Bioquímica e Departamento de Química e Bioquímica, Faculdade de  
Ciências, Universidade de Lisboa, 1749-016 Lisboa, Portugal.; E-mail: memp@fc.ul.pt.*

**KEYWORDS:** Protic Ionic Liquids / enthalpy of vaporization / enthalpy of formation /  
calorimetry / *ab-initio* calculations / W1-F12 / CCSD(T)-F12a

### $pK_a$ and $\Delta pK_a$ values

Aqueous  $pK_a$  values of precursor species HA and of the conjugated acid  $HB^+$  of precursor species B, as well as their differences ( $\Delta pK_a$ ), are presented in Table S1.

**Table S1. Values of  $pK_a$  and  $\Delta pK_a$  at 298.15 K used in this work.**

| Species               | $pK_a$                                | Species       | $\Delta pK_a$          |
|-----------------------|---------------------------------------|---------------|------------------------|
| HOAc                  | 4.756±0.002 <sup>a</sup>              | [HDMBuA][OAc] | 5.30±0.04 <sup>e</sup> |
| [HDMBuA] <sup>+</sup> | 10.02; <sup>b</sup> 10.1 <sup>b</sup> | [HTMEDA][OAc] | 3.94±0.44 <sup>e</sup> |
| [HTMEDA] <sup>+</sup> | 8.26; <sup>a</sup> 9.14 <sup>c</sup>  | [HDMEtA][OAc] | 4.35±0.02              |
| [HDMEtA] <sup>+</sup> | 9.11±0.02 <sup>d</sup>                |               |                        |

<sup>a</sup>Reference 1; the uncertainty was assumed as two units of the last digit given in the data source. <sup>b</sup>Reference 2. <sup>c</sup>Reference 3. <sup>d</sup>Calculated from the equation:  $pK_a = -(2.151 \pm 0.046) \times 10^{-2} T + 15.52 \pm 0.14$  ( $r^2 = 0.9991$ ) obtained from a least squares linear fit to the data in reference 4 ( $T$  represents the temperature in K); the assigned uncertainty is the linear interpolation uncertainty of  $pK_a$  at  $T = 298.15$  K. <sup>e</sup> Calculated using the mean value of the two published  $pK_a$  results given in this table; uncertainty corresponds to the mean deviation.

## Calvet-drop microcalorimetry

Direct measurements of the standard molar enthalpies of vaporization of the studied PILs and their constituent amines were carried out by Calvet-drop microcalorimetry, as described in the main text. Results are summarized in Table S2.

**Table S2. Standard specific enthalpy of vaporization,  $\Delta_{\text{vap}}h^\circ/\text{J}\cdot\text{g}^{-1}$ , of amines and PILs obtained by Calvet-drop microcalorimetry at 297.93 K.**

| Amines/PILs                                                             | DMBuA              | TMEDA             | DMEtA             | [HDMBuA][OAc]     | [HTMEDA][OAc]     | [HDMEtA][OAc]     |
|-------------------------------------------------------------------------|--------------------|-------------------|-------------------|-------------------|-------------------|-------------------|
| $M / \text{g}\cdot\text{mol}^{-1}$                                      | 101.190            | 116.209           | 89.138            | 161.245           | 176.260           | 149.190           |
| $\Delta_{\text{vap}}h^\circ / \text{J}\cdot\text{g}^{-1}$               | 349.586            | 370.895           | 526.250           | 663.648           | 663.648           | 796.545           |
|                                                                         | 354.331            | 366.870           | 534.395           | 667.617           | 663.599           | 795.269           |
|                                                                         | 342.641            | 376.427           | 529.967           | 673.758           | 665.108           | 804.606           |
|                                                                         | 343.631            | 368.116           | 528.869           | 688.508           | 660.580           | 796.614           |
| $\langle\Delta_{\text{vap}}h^\circ\rangle / \text{J}\cdot\text{g}^{-1}$ | $347.55 \pm 2.73$  | $370.58 \pm 2.12$ | $529.87 \pm 1.70$ | $673.38 \pm 5.45$ | $663.23 \pm 0.95$ | $798.26 \pm 2.14$ |
| $\langle\varepsilon\rangle / \text{mV}\cdot\text{W}^{-1}$               | $64.112 \pm 0.034$ |                   |                   |                   |                   |                   |
| $\sigma(\text{over-all}) / \text{J}\cdot\text{g}^{-1}$                  | 2.74               | 2.13              | 1.72              | 5.46              | 1.01              | 2.18              |
| $\Delta_{\text{vap}}H_m^\circ / \text{kJ}\cdot\text{mol}^{-1}$          | $35.2 \pm 0.6$     | $43.1 \pm 0.5$    | $47.2 \pm 0.3$    | $108.6 \pm 1.8$   | $116.9 \pm 0.4$   | $119.1 \pm 0.7$   |

## Solution Calorimetry

Indirect measurements of  $\Delta_{\text{vap}}H_{\text{m}}^{\circ}$  were performed following an adaptation of the procedure previously described by Vitorino *et al.*<sup>5,6</sup>, as described in the main text. Results of the solution calorimetry measurements are summarized in Table S3.

**Table S3. Standard molar enthalpies of solution,  $\Delta_{\text{sol}}H_{\text{m}}^{\circ}$  / kJ·mol<sup>-1</sup>, of amines and PILs at 298.15 K.**

| Amines/PILs                                                                     | DMBuA        | TMEDA        | DMEtA        | [HDMBuA][OAc] | [HTMEDA][OAc] | [HDMEtA][OAc] |
|---------------------------------------------------------------------------------|--------------|--------------|--------------|---------------|---------------|---------------|
|                                                                                 | Eqn 10       |              |              | Eqn 8         |               |               |
|                                                                                 | 60.427       | 79.659       | 55.303       | 46.102        | 59.810        | 31.849        |
|                                                                                 | 62.267       | 71.636       | 57.848       | 47.607        | 55.999        | 32.757        |
| $-\Delta_{\text{sol}}H_{\text{m}}^{\circ}$ / kJ·mol <sup>-1</sup>               | 60.798       | 78.774       | 60.894       | 46.733        | 56.870        | 36.698        |
|                                                                                 | 57.873       | 79.585       | 57.966       | 47.839        | 61.472        | 35.078        |
|                                                                                 | 66.439       | 80.105       | 55.623       | 45.862        | 60.000        | 35.613        |
|                                                                                 | 64.712       | 73.882       |              |               |               | 32.400        |
| $-\langle\Delta_{\text{sol}}H_{\text{m}}^{\circ}\rangle$ / kJ·mol <sup>-1</sup> | 62.09 ± 2.53 | 77.27 ± 2.93 | 57.53 ± 2.01 | 46.83 ± 0.79  | 58.83 ± 2.06  | 34.07 ± 1.62  |

## Computational Details

The individual components of the W1-F12 enthalpies are summarized in Table S4. The gas-phase standard enthalpy of formation for each of the amines under study was calculated from the respective atomization reaction using the W1-F12 enthalpies, as described in the main text (Table S5). The CCSD(T)-F12a/3C(FIX)/cc-pVDZ-F12 energies and enthalpies of acetic acid, amines, and the gaseous species resulting from combination of amines with acetic acid are given in Table S6. The corresponding entropies calculated by Statistical Mechanics,<sup>7</sup> using vibration frequencies obtained by the DF-B3LYP-D3/cc-pVTZ method and scaled by 0.9889<sup>8</sup> are listed in Table S7.

**Table S4. Components of the W1-F12 enthalpies. All data in hartree.**

|                                                 | SCF         | val. CCSD | val. T    | core-valence | relativistic | spin-orbit | DBOC <sup>a</sup> | $H(\text{thermal})^b$ | $H^\circ(298.15 \text{ K})^c$ |
|-------------------------------------------------|-------------|-----------|-----------|--------------|--------------|------------|-------------------|-----------------------|-------------------------------|
| C                                               | -37.688596  | -0.097659 | -0.002630 | -0.051452    | -0.014935    | -0.000135  | 0.001660          | 0.002360              | -37.851387                    |
| H                                               | -0.499967   | 0.000000  | 0.000000  | 0.000000     | -0.000006    | 0.000000   | 0.000272          | 0.002360              | -0.497341                     |
| O                                               | -74.812001  | -0.187544 | -0.004126 | -0.057770    | -0.052097    | -0.000355  | 0.002366          | 0.002360              | -75.109167                    |
| N                                               | -54.400727  | -0.125442 | -0.003085 | -0.054926    | -0.029194    | 0.000000   | 0.002005          | 0.002360              | -54.609009                    |
| <i>N,N</i> -dimethylbutylamine                  | -290.499080 | -1.451255 | -0.061411 | -0.375568    | -0.116625    | 0.000000   | 0.015431          | 0.213019              | -292.275488                   |
| <i>N,N,N',N'</i> -tetramethylethane-1,2-diamine | -345.527481 | -1.685549 | -0.072961 | -0.431273    | -0.145390    | 0.000000   | 0.017663          | 0.231307              | -347.613684                   |
| <i>N,N</i> -dimethylethanol amine               | -287.290688 | -1.315858 | -0.055392 | -0.327077    | -0.139012    | 0.000000   | 0.013462          | 0.160782              | -288.953783                   |

<sup>a</sup> Diagonal Born-Oppenheimer correction. <sup>b</sup> Thermal enthalpy correction at 298.15 K. Includes the zero-point vibrational energy. <sup>c</sup> Enthalpy at  $T = 298.15 \text{ K}$  and  $p^\circ = 1 \text{ bar}$ .

**Table S5. Contribution of each component of the W1-F12 procedure to the gas-phase standard molar enthalpies of formation. All data in  $\text{kJ mol}^{-1}$ .**

|                                                 | SCF    | val. CCSD | val. T | core-valence | relativistic | spin-orbit | DBOC <sup>a</sup> | $H(\text{thermal})^b$ | $\Delta_{\text{at}}H_{\text{m}}^\circ{}^c$ | $\Delta_{\text{f}}H_{\text{m}}^\circ{}^d$ |
|-------------------------------------------------|--------|-----------|--------|--------------|--------------|------------|-------------------|-----------------------|--------------------------------------------|-------------------------------------------|
| <i>N,N</i> -dimethylbutylamine                  | 6477.8 | 1942.5    | 111.7  | 31.3         | -6.0         | -2.1       | 1.6               | -423.0                | 8133.9                                     | $-91.2 \pm 2.7$                           |
| <i>N,N,N',N'</i> -tetramethylethane-1,2-diamine | 6813.1 | 2228.3    | 133.9  | 33.4         | -7.1         | -2.1       | 1.7               | -458.6                | 8742.6                                     | $-9.2 \pm 2.8$                            |
| <i>N,N</i> -dimethylethanol amine               | 4788.8 | 1607.4    | 98.9   | 22.5         | -5.5         | -2.3       | 1.4               | -316.8                | 6194.4                                     | $-207.8 \pm 1.8$                          |

<sup>a</sup> Diagonal Born-Oppenheimer correction. <sup>b</sup> Thermal enthalpy correction at 298.15 K. Includes the zero-point vibrational energy. <sup>c</sup> Enthalpy of atomization at  $T = 298.15 \text{ K}$  and  $p^\circ = 1 \text{ bar}$ . <sup>d</sup> Enthalpy of formation at  $T = 298.15 \text{ K}$  and  $p^\circ = 1 \text{ bar}$ .

**Table S6. CCSD(T)-F12a/3C(FIX)/cc-pVDZ-F12 energies and enthalpies. All data in hartree.**

|               | energy <sup>a</sup> | <i>H</i> (thermal) <sup>b</sup> | <i>H</i>    |
|---------------|---------------------|---------------------------------|-------------|
| HOAc          | -228.830891         | 0.066283                        | -228.764608 |
| DMEtA         | -288.629110         | 0.160782                        | -288.468328 |
| TMEDA         | -347.251050         | 0.231307                        | -347.019743 |
| DMBuA         | -291.983365         | 0.213019                        | -291.770346 |
| [DMEtA][HOAc] | -517.479781         | 0.229099                        | -517.250682 |
| [TMEDA][HOAc] | -576.104836         | 0.300036                        | -575.804800 |
| [DMBuA][HOAc] | -520.836438         | 0.282415                        | -520.554023 |

<sup>a</sup> CCSD(T)-F12a/3C(FIX)/cc-pVTZ-F12 energy. <sup>b</sup> Thermal enthalpy correction at 298.15 K. Includes the zero-point vibrational energy. <sup>c</sup> Enthalpy at *T* = 298.15 K.

**Table S7. Standard (*p*<sup>o</sup> = 1 bar) molar entropies at 298.15 K.**

|               | <i>S</i> <sub>m</sub> <sup>o</sup> /J·K <sup>-1</sup> ·mol <sup>-1</sup> |
|---------------|--------------------------------------------------------------------------|
| HOAc          | 288.8                                                                    |
| DMEtA         | 349.2                                                                    |
| TMEDA         | 401.7                                                                    |
| DMBuA         | 375.4                                                                    |
| [DMEtA][HOAc] | 443.7                                                                    |
| [TMEDA][HOAc] | 488.3                                                                    |
| [DMBuA][HOAc] | 491.0                                                                    |

## Standard Molar Enthalpies of Formation of Gaseous [HDMBuA]<sup>+</sup>, [HTMEDA]<sup>+</sup>, and [HDMEtA]<sup>+</sup>

The standard molar enthalpies of formation of gaseous [HDMBuA]<sup>+</sup>, [HTMEDA]<sup>+</sup>, and [HDMEtA]<sup>+</sup> (Table S6) were obtained from:

$$\Delta_f H_m^\circ([\text{HB}]^+, \text{g}) = \Delta_f H_m^\circ(\text{B}, \text{g}) + \Delta_f H_m^\circ(\text{H}^+, \text{g}) - PA(\text{B}) \quad (\text{S1})$$

where  $\Delta_f H_m^\circ(\text{B}, \text{g})$  and  $PA(\text{B})$  represent the standard molar enthalpies of formation and the proton affinities of the corresponding neutral amines, respectively (Table S6), and  $\Delta_f H_m^\circ(\text{H}^+, \text{g}) = 1536.202 \pm 0.080 \text{ kJ}\cdot\text{mol}^{-1}$ .<sup>9</sup>

**Table S8. Standard molar enthalpies of formation and proton affinities of amines at 298.15 K.**

| Species | $-\Delta_f H_m^\circ(\text{B}, \text{g}) / \text{kJ}\cdot\text{mol}^{-1}$ <sup>a</sup> | $PA(\text{B}) / \text{kJ}\cdot\text{mol}^{-1}$ | $\Delta_f H_m^\circ([\text{HB}]^+, \text{g})$ |
|---------|----------------------------------------------------------------------------------------|------------------------------------------------|-----------------------------------------------|
| DMBuA   | 91.2±2.7                                                                               | 969.2±8.0 <sup>b</sup>                         | 475.8±8.4                                     |
| TMEDA   | 9.2±2.8                                                                                | 1012.8±8.0 <sup>b</sup>                        | 514.2±8.5                                     |
| DMEtA   | 207.8±1.8                                                                              | 943.3±16.1 <sup>c</sup>                        | 385.1±16.2                                    |

<sup>a</sup> This work, see Table 1 of main text. <sup>b</sup> From reference 10. <sup>c</sup> Mean value of the B3LYP/6-311+G\*\* and MP2/6-311+G\*\*//B3LYP/6-311+G\*\* values given in reference 11 and corresponding mean deviation.

## References

- 1 Haynes W. M., *CRC Handbook of Chemistry and Physics, 97th Edition*, 2017.
- 2 M. M. Kreevoy and S.-W. Oh, *J. Am. Chem. Soc.*, 1973, **95**, 4805–4810.
- 3 R. L. Gustafson and A. E. Martell, *J. Am. Chem. Soc.*, 1959, **81**, 525–529.
- 4 R. J. Littel, M. Bos and G. J. Knoop, *J. Chem. Eng. Data*, 1990, **35**, 276–277.
- 5 J. Vitorino, C. E. S. Bernardes and M. E. Minas da Piedade, *Phys. Chem. Chem. Phys.*, 2012, **14**, 4440–4446.
- 6 J. Vitorino, F. Agapito, M. F. M. Piedade, C. E. S. Bernardes, H. P. Diogo, J. P. Leal and M. E. Minas da Piedade, *J. Chem. Thermodyn.*, 2014, **77**, 179–189.
- 7 K. K. Irikura and D. J. Frurip, *Computational Thermochemistry. Prediction and Estimation of Molecular Thermodynamics*, ACS Symposium Series No. 677, Washington, 1998.
- 8 M. K. Kesharwani, B. Brauer and J. M. L. Martin, *J. Phys. Chem. A*, 2015, **119**, 1701–1714.
- 9 R. L. Wagman, D. D.; Evans, W. H.; Parker, V. B.; Schumm, R. H.; Halow, I.; Bailey, S. M.; Churney, K. L.; Nuttall, *J. Phys. Chem. Ref. Data, Suppl. 2*, 1982, **11**, 1–392.
- 10 E. P. Hunter and S. G. Lias, *J. Phys. Chem. Ref. Data*, 1998, **27**, 413–656.
- 11 N. N. Chipanina, T. N. Aksamentova, S. N. Adamovich, A. I. Albanov, A. N. Mirskova, R. G. Mirskov and M. G. Voronkov, *Comput. Theor. Chem.*, 2012, **985**, 36–45.
